# Supplementary material
Source: publisher figshare collection journal article supplement (https://tandf.figshare.com/ndownloader/files/12249272)
Supplement: Supplementary file 1 [file 12249272]

**Synthesis, crystal structure and desulfurization properties of** **zig-zag 1D coordination polymer of copper(II)** **containing 4-methoxybenzoic acid ligand**

*Adedibu C. Tellaa*; Samson O. Owaludea, Sunday J. Olatunjia, Solomon O. Oloyedea, Adeniyi S. Ogunlajab* and Susan A. Bournec*

*aDepartment of Chemistry, P.M.B.1515, University of Ilorin, Ilorin, Kwara State, Nigeria*

*bDepartment of Chemistry, Nelson Mandela University, PO Box 77000, Port Elizabeth, 6031, South Africa*

*cCentre for Supramolecular Chemistry Research, Department of Chemistry, University of CapeTown, Rondebosch 7701, South Africa*

**Corresponding authors*

*E-mail address:*

*(Adedibu C. Tella)* [*adedibu@unilorin.edu.ng*](mailto:adedibu@unilorin.edu.ng)

*(Adeniyi S. Ogunlaja)* [*adeniyi.ogunlaja@mandela.ac.za*](mailto:adeniyi.ogunlaja@mandela.ac.za)

**Supplementary Information**

**Fig. S1.** Nitrogen adsorption-desorption isotherm of [Cu(4-mba)2(H2O)3].


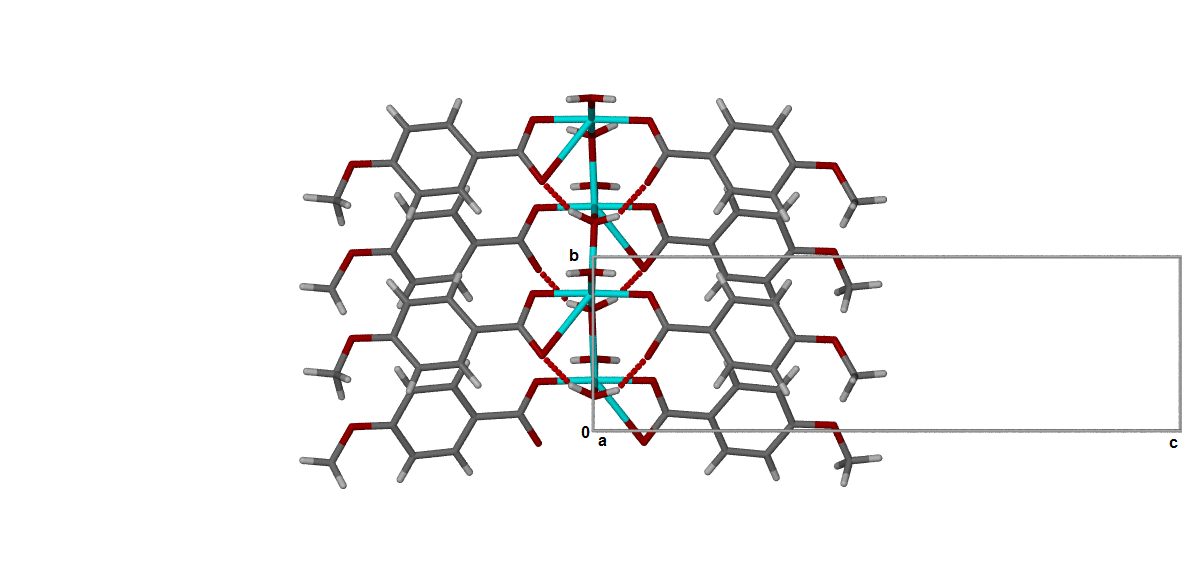


A


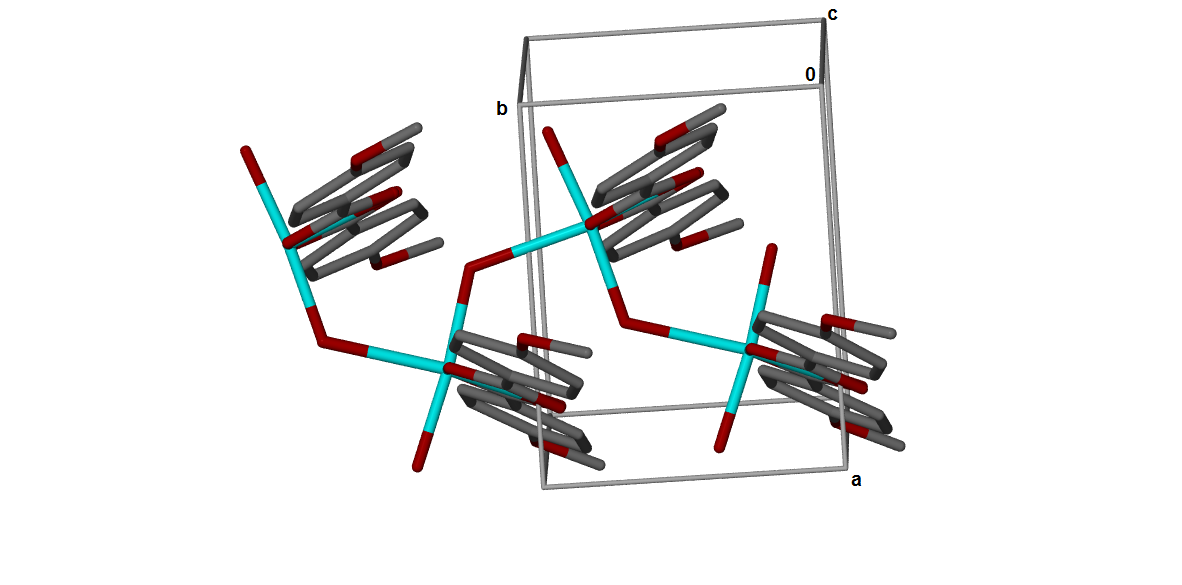


B

**Fig. S2** ORTEP diagram showing (A) zigzag 1D unit of [Cu(4-mba)2(H2O)3] held by strong hydrogen bonds and (b) crystal packing of zigzag 1D unit of [Cu(4-mba)2(H2O)3].

**Table S1** Crystal data and structure refinement for [Cu(4-mba)2(H2O)2]

| Empirical formula | C16H18CuO8 |
| --- | --- |
| Shape and Colour | Plate and Blue |
| Formula weight | 401.85 |
| Temperature/K | 193.0 |
| Crystal system | monoclinic |
| Space group | P 21 |
| Hall group | P 2yb |
| a/Å | 7.3339(1) |
| b/Å | 5.7970(9) |
| c/Å | 19.6400(3) |
| α/° | 90.00 |
| β/° | 93.30 |
| γ/° | 90.00 |
| Volume/Å3 | 833.60(4) |
| Z | 2 |
| ρcalcmg/mm3 | 1.572 |
| m/mm‑1 | 0.89 |
| F(000) | 414.0 |
| µ/mm-1 | 1.352 |
| θ range for data collection | 3.8 to 28° |
| Index ranges | -8 ≤ h ≤ 8, -9 ≤ k ≤ 9, -8 ≤ l ≤ 13 |
| Reflections collected | 1902 |
| Independent reflections | 1966[R(int) = 0.0857] |
| Data/restraints/parameters | 2137/0/181 |
| Goodness-of-fit on F2 | 1.07 |
| Final R indexes [I>=2σ (I)] | R1 = 0.042, wR2 = 0.094 |
| Final R indexes [all data] | R1 = 0.0605, wR2 = 0.1337 |
| Largest diff. peak/hole / e Å-3 | 0.32/-0.45 |

**Fig. S3.** Effect of concentrations over [Cu(4-mba)2(H2O)3].

**Fig. S4.** Effect of contact time on desulfurization over adsorbent, [Cu(4-mba)2(H2O)3].

**Fig. S5.** Effect of temperature on the desulfurization over [Cu(4-mba)2(H2O)3].

**Fig. S6.** Effect of adsorbent dosage on the desulfurization over [Cu(4-mba)2(H2O)3] at initial concentrations of 100 mg/L.

**Fig. S7** Plots of the adsorption kinetics of the desulfurization over [Cu(4-mba)2(H2O)3] (a) pseudo-first-order kinetics (b) pseudo-second-order kinetics.

**Fig S8**(a). Langmuir isotherm plot of the desulphurization over [Cu(4-mba)2(H2O)3]

**Fig S8** (b). Freundlich isotherm plot of the desulphurization over [Cu(4-mba)2(H2O)3]

**Fig. S9.** GC-FIDchromatograms of model fuel, dibenzothiophene in hexane (A) before adsorption, and (B) after adsorption.
